# Supplementary material for: Quantum dot-based biomimetic fluorescence immunoassays for enrofloxacin detection in animal-derived foods
Source: Royal Society of Chemistry journal article supplement (doi:10.1039/d4ay01753f), 2024-01-01
Supplement: d4ay01753f1.pdf [file d4ay01753f1.pdf]

## **Quantum dot-based biomimetic fluorescence immunoassays for enrofloxacin detection in animal-derived foods**

Gaoshuang Hu<sup>1</sup>, Ziyang Liu<sup>1</sup>, Yiqin Zhang<sup>2</sup>, Tao Zhao<sup>3</sup>, Zhuqing Xing<sup>4</sup>, Shan Gao<sup>1,\*</sup>, Jianxiong  
Hao<sup>1,\*</sup>

1. College of Food Science and Biology, Hebei University of Science and Technology,  
Shijiazhuang, Hebei 050018, P.R. China
2. Shijiazhuang Customs District P.R.China, Shijiazhuang, Hebei 050061, China
3. Faculty of Food Science and Engineering, Qilu University of Technology (Shandong  
Academy of Sciences), Jinan, Shandong 250353, China
4. School of Public Health, Tianjin University of Traditional Chinese Medicine, Tianjin 301617,  
China

\*Corresponding author: Shan Gao

Tel: +86 319 8166 8472

Email: gaoshanmyday@163.com

\*Corresponding author: Jianxiong Hao

Tel: +86 319 8166 8472

Email: cauhjx@163.com

## **1. Figure Captions**

**Fig. S1.** The repeatability of MIPs and NIPs.

**Fig. S2.** Fluorescence spectra of different concentrations of ENRO (0-100  $\mu\text{g/L}$ ) in the detection system.

**Fig. S3.** Correlation between the proposed method results and commercial ELISA kits results for ENRO detection in food of animal origin.

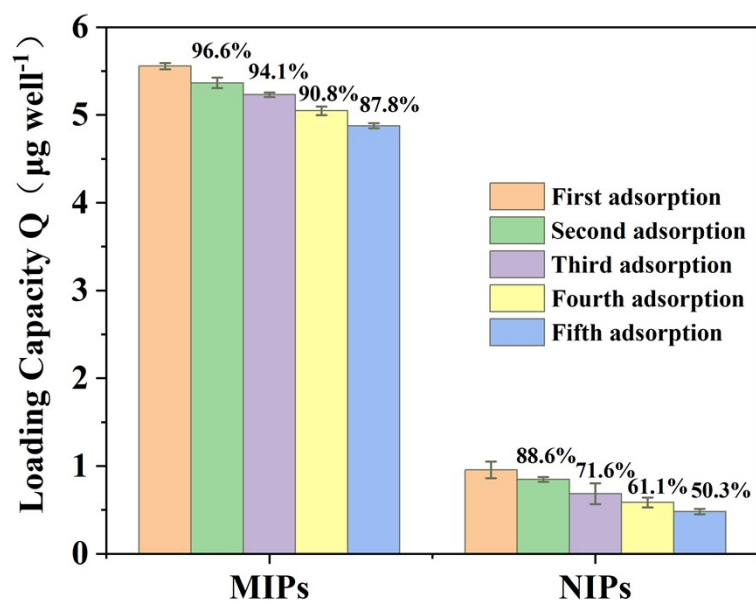

**Fig. S1.** The repeatability of MIPs and NIPs

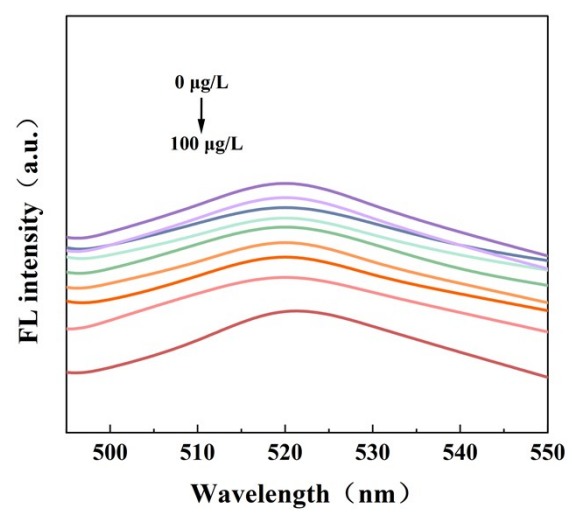

**Fig. S2.** Fluorescence spectra of different concentrations of ENRO (0-100  $\mu\text{g/L}$ ) in the detection system

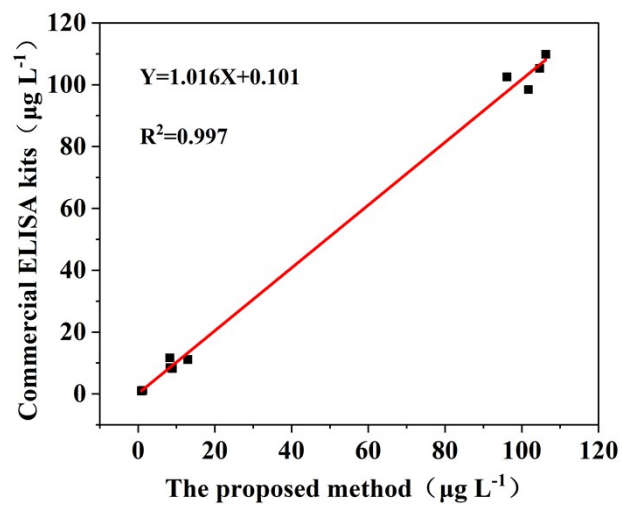

**Fig. S3.** Correlation between the proposed method results and commercial ELISA kits results for ENRO detection in food of animal origin.
